# Supplementary material
Source: publisher figshare collection journal article supplement (https://frontiersin.figshare.com/ndownloader/files/30750994)
Supplement: Supplementary file 1 [file 30750994]

## Sheet: Sheet1
time	real	VMD-AMS-TCN-2	MSC-SA-TCN-2	MMED-TCN-2
0	7.424	7.91405	6.79492	6.7142
1	6.358	6.79492	5.66086	5.98525
2	5.508	5.5902	5.33472	4.75003
3	4.096	4.58544	4.08021	3.95331
4	3.638	3.27965	2.74496	1.6969
5	5.044	4.6668	4.81917	4.00643
6	3.986	4.9502	3.68131	3.05397
7	4.817	4.51116	4.4338	3.66025
8	3.072	3.51758	3.13011	2.82365
9	2.414	3.00453	2.28906	1.8166
10	1.916	2.92866	1.87081	2.17612
11	3.323	3.72667	2.80342	2.94431
12	4.014	4.70893	3.97798	3.56346
13	5.708	5.71208	5.17717	4.37653
14	5.809	6.03473	5.21075	4.98431
15	5.71	6.21793	5.68979	4.42978
16	9.225	8.15048	8.79743	7.95686
17	7.458	8.493	7.49174	6.05366
18	9.696	9.96876	10.2605	9.04542
19	11.881	12.055	11.8571	10.681
20	13.391	13.3432	13.6587	11.8718
21	11.504	11.9923	12.2511	10.6259
22	10.751	11.3209	11.2775	10.0203
23	10.944	10.6993	11.2804	9.51078
24	10.041	10.2726	10.6783	9.43754
25	9.474	9.57067	9.45161	8.15496
26	11.31	12.5389	11.8476	11.307
27	15.532	15.0546	14.9123	14.1098
28	14.526	16.7271	14.7774	14.6559
29	21.048	19.7717	20.5181	20.0922
30	22.64	23.2374	22.3845	22.3863
31	24.434	24.7945	24.2295	23.7384
32	26.38	27.8824	26.3714	26.4269
33	29.471	29.8613	29.3457	28.6379
34	28.484	29.1201	27.4556	27.3915
35	28.571	29.8379	29.3622	28.6188
36	30.538	31.8129	29.8587	30.5208
37	30.604	32.4715	31.2102	30.791
38	29.144	30.2739	28.3729	28.7969
39	28.588	30.0778	28.5895	28.6236
40	31.585	32.2392	30.6019	31.2777
41	34.641	35.6821	34.6675	34.1694
42	35.833	36.8652	34.9422	35.3187
43	38.561	39.6717	38.2049	37.7828
44	39.751	41.1717	39.622	40.29
45	42.845	43.856	42.1599	42.7212
46	43.842	44.4891	43.4726	44.4184
47	42.117	43.4583	40.9998	41.2653
48	40.972	41.7815	40.5677	40.8892
49	42.911	42.9928	41.8214	42.1385
50	42.386	43.0846	41.9963	41.9491
51	40.859	41.5276	40.6571	40.262
52	36.732	36.922	35.9359	36.0161
53	33.006	33.6962	32.5801	32.1335
54	32.393	32.2309	32.0146	31.6147
55	31.185	31.8782	30.8306	30.248
56	35.631	35.5444	34.5652	34.2855
57	39.904	39.9429	39.0671	38.4944
58	41.561	42.0519	40.9438	40.4332
59	43.912	43.3151	42.7598	41.7318
60	44.538	44.7827	43.8831	43.3271
61	44.139	44.7223	43.6509	42.2576
62	44.572	44.4808	44.0237	43.5472
63	43.689	44.6234	43.2272	42.3081
64	45.321	45.3636	44.6455	44.683
65	44.765	45.6644	44.5868	43.6181
66	45.098	45.4743	44.1222	44.6124
67	44.299	45.0324	44.0594	43.489
68	45.527	45.7483	44.9364	45.1451
69	45.221	45.7334	44.5479	43.9371
70	45.284	45.5739	44.6797	44.4945
71	43.767	44.5096	43.2914	42.5835
72	44.148	45.0033	43.573	43.0987
73	45.148	45.6742	44.6313	44.103
74	44.941	46.1189	44.5441	44.541
75	45.523	46.2918	44.9212	44.8996
76	44.614	45.8778	44.6459	44.751
77	44.607	45.559	44.0041	43.8447
78	44.171	45.887	44.2707	44.7216
79	45.142	45.717	44.5094	44.5593
80	42.281	43.8931	41.9627	42.5983
81	43.347	43.6455	43.2729	42.9871
82	43.095	43.7005	42.3457	42.9036
83	43.029	43.924	43.0208	42.8736
84	44.672	45.6777	44.1459	44.4347
85	45.304	46.0776	44.3846	44.6106
86	44.878	45.8623	44.1718	44.3462
87	44.929	45.5002	44.3661	44.0983
88	42.766	44.2315	42.736	42.7506
89	42.091	42.8152	41.9936	41.4701
90	40.397	42.057	40.4697	40.5069
91	42.908	43.158	42.5662	42.3576
92	43.521	45.0579	43.4245	43.6527
93	44.219	44.4914	43.4417	43.0899
94	41.615	43.4696	41.258	41.6089
95	44.327	44.1043	43.5423	42.9253
96	44.632	45.297	43.8217	44.0918
97	44.602	45.3504	43.8783	43.5705
98	44.805	45.0058	44.2391	44.3181
99	44.075	44.9764	43.3892	42.9677
100	45.294	45.8606	44.7682	44.5603
101	45.068	45.2559	44.2695	43.7429
102	43.766	44.928	43.1574	43.119
103	45.566	45.8164	45.3883	44.5032
104	44.531	45.8009	44.2074	44.5638
105	45.223	45.832	44.7688	44.2717
106	45.174	45.9502	44.8403	45.0547
107	44.453	45.1914	43.7109	43.3138
108	44.763	45.2402	44.3675	44.1334
109	44.79	44.7819	43.991	43.2319
110	44.176	44.4189	44.0418	43.4464
111	44.153	43.972	43.5185	42.376
112	42.868	43.8972	43.2356	42.4403
113	44.654	44.1256	44.1421	43.0717
114	43.796	44.7547	43.8737	43.377
115	43.953	43.6863	43.3874	42.7382
116	41.725	43.7381	41.9767	41.7397
117	44.799	43.9759	44.6426	43.7025
118	42.612	43.9974	42.4809	42.2367
119	44.174	44.1301	44.3195	43.1859
120	45.078	45.9627	44.8092	44.7239
121	45.427	46.333	45.3322	44.4301
122	44.869	45.8667	44.8138	44.5607
123	43.271	44.3332	43.4225	42.4461
124	43.17	44.1125	43.0182	42.6687
125	44.264	44.8172	44.4743	43.5957
126	44.969	46.0803	44.5793	44.8111
127	44.991	45.4433	44.9223	44.3737
128	42.853	44.6708	42.6944	42.8821
129	43.923	43.8074	43.4504	42.9711
130	42.565	44.1283	42.3139	42.6094
131	44.722	44.8006	44.2269	43.8745
132	45.345	45.9712	44.5692	45.0241
133	44.612	45.3335	44.0209	43.6795
134	43.346	43.9286	42.8736	43.0963
135	42.561	42.8402	42.0992	41.3437
136	43.826	44.1936	43.1856	43.2033
137	44.69	44.7997	43.9672	43.1449
138	43.858	44.321	43.1464	43.2547
139	43.996	44.5705	43.7713	43.2317
140	45.124	45.7619	44.3526	44.4544
141	45.491	46.0061	45.4161	44.8745
142	45.649	46.2855	44.9963	45.1238
143	45.58	46.2578	45.1288	44.7533
144	45.672	46.6369	45.3062	45.5476
145	45.833	46.136	45.2845	44.8811
146	44.355	45.6776	44.1419	44.294
147	45.206	45.6759	44.9999	44.5163
148	44.593	45.5274	44.235	44.6262
149	44.096	44.8373	43.8412	43.625
150	45.202	45.8638	44.7542	45.0811
151	44.197	45.361	44.3246	43.9498
152	43.718	44.4896	43.3444	43.5717
153	44.166	44.7633	44.3131	43.9056
154	45.731	46.2279	45.1418	45.2673
155	44.861	45.8341	44.8272	44.3905
156	43.706	44.2819	43.345	43.3359
157	41.729	42.8048	41.8639	41.2248
158	43.392	43.8395	43.0969	42.8038
159	44.002	45.0133	43.9039	43.4218
160	45.679	46.0155	45.3134	45.3547
161	45.605	46.5117	45.5198	44.8257
162	45.341	46.2505	45.0865	45.1442
163	44.143	44.7919	43.8723	43.3541
164	42.597	43.5631	42.5066	42.4529
165	42.545	42.8436	42.2518	41.6627
166	42.915	43.5482	42.7152	42.5843
167	42.96	43.7746	42.6922	42.186
168	42.576	43.2209	42.4958	42.1335
169	42.775	43.6227	42.9327	42.1553
170	43.336	43.9961	43.0754	42.7765
171	41.878	42.4752	41.7414	40.8586
172	39.594	40.2409	39.5511	39.3164
173	37.671	38.0944	37.4887	36.5353
174	36.168	37.8114	36.5522	36.108
175	39.586	39.2115	39.4519	38.5069
176	39.038	40.4856	39.0052	38.901
177	41.037	41.2783	40.6775	40.0479
178	40.131	41.1256	39.7991	39.8607
179	36.812	37.5508	36.6135	36.0163
180	32.575	33.8507	32.4379	32.5463
181	29.471	29.7459	29.5578	28.4416
182	25.613	25.4662	25.2233	25.1083
183	23.417	24.3315	24.2433	23.0108
184	27.827	27.9427	27.4479	27.2951
185	27.216	28.3289	27.7061	26.892
186	24.719	25.0086	24.4675	24.1844
187	19.374	19.9814	19.5803	18.8136
188	18.622	19.1551	18.4586	18.1415
189	21.038	20.9068	21.1154	20.3803
190	22.382	22.0717	22.2022	21.9969
191	21.104	21.6458	21.0354	20.6947
192	21.383	22.8536	21.6427	21.7306
193	26.914	25.5828	26.5587	25.6934
194	27.9	29.1885	27.6453	28.0769
195	29.766	29.728	29.3398	28.423
196	29.358	29.2942	28.6906	29.0576
197	27.771	29.4578	28.2332	27.5965
198	31.179	31.158	30.8306	30.7578
199	30.035	31.7841	30.8501	30.2469
200	32.298	32.4561	32.0391	31.8794
201	29.596	30.6213	29.8219	29.1234
202	26.029	27.3616	26.3684	25.74
203	23.187	23.1014	23.3789	22.6876
204	20.609	20.8264	20.1964	19.9316
205	20.002	20.473	20.3122	19.8764
206	22.745	23.9201	22.724	22.8787
207	24.908	24.967	24.1542	23.9618
208	21.882	22.6775	21.968	21.9097
209	20.469	20.3487	20.3591	19.7859
210	21.443	21.6204	21.2133	21.4231
211	20.506	20.6002	20.2852	19.7305
212	18.294	18.9691	18.3673	18.2815
213	17.778	17.9661	17.6809	16.8294
214	15.69	16.1818	15.3697	15.5221
215	15.403	15.5589	15.7736	15.2888
216	16.697	16.8034	16.0365	16.1938
217	14.95	15.9265	15.5713	14.93
218	14.602	14.8613	13.989	13.8898
219	14.719	14.618	14.6533	14.2531
220	14.368	14.3344	13.9308	13.9069
221	12.287	12.6732	12.2117	11.3497
222	10.796	11.3385	10.6723	10.4831
223	12.264	12.3376	12.2531	11.5221
224	13.882	14.6501	14.3098	14.0006
225	13.687	13.8524	13.628	12.9966
226	11.493	12.2368	11.234	11.2111
227	12.451	11.8807	12.0128	11.3258
228	11.373	11.9391	11.1109	10.9708
229	11.112	10.7697	10.6804	9.79245
230	9.779	9.64902	9.18423	8.93408
231	7.823	8.70922	8.38521	7.1908
232	7.655	8.59862	8.2286	7.72913
233	8.374	8.4036	8.38599	7.42716
234	8.717	8.91084	8.38761	8.03536
235	8.237	8.47884	8.1883	7.06351
236	7.15	7.42796	6.65903	6.26297
237	5.723	6.1346	5.94563	5.20694
238	4.255	4.55392	4.51276	3.98202
239	4.199	4.10136	4.1149	3.3352
240	3.914	4.13425	3.83246	3.40509
241	3.252	3.53845	3.31321	2.70517
242	2.563	2.79601	2.75909	2.14567
243	2.835	2.58497	2.76551	1.95941
244	2.254	2.39234	2.08631	2.07089
245	2.408	2.05092	2.06742	1.5074
246	1.44	1.28766	1.20437	0.804063
247	0.913	0.880654	0.852799	0.0928512
248	1.194	1.15944	0.908673	0.742527
249	1.02	0.916124	0.890822	0.263672
250	0.46	0.351826	0	0
251	0.357	0.311814	0.262075	0
252	0.51	0.699517	0	0
253	0.425	1.10259	0.378262	0
254	0.686	1.65557	0.81835	0.734556
255	0.918	2.0221	1.1214	0.748557
256	0.706	1.43025	0.418564	0.23061
257	0.324	1.13533	0.376708	0
258	0.015	0.768174	0	0
259	0	0.783428	0	0
260	0	0.524841	0	0
261	0	0.733133	0	0
262	0	0.568088	0	0
263	0	0.747126	0	0
264	0	0.459662	0	0
265	0	0.490461	0	0
266	0	0.276925	0	0
267	0	0.393031	0	0
268	0	0.0373324	0	0
269	0	0.104484	0	0
270	0	0.0116312	0	0
271	0	0.244871	0	0
272	0	0.0733316	0	0
273	0	0.0655099	0	0
274	0	0	0	0
275	0.043	0	0	0
276	0.154	0	0	0
277	0.592	0.397845	0	0
278	1.26	0.973969	0.608671	0.34333
279	1.364	1.33891	0.797518	0.417669
280	1.243	1.2932	0.820046	0.551843
281	1.355	1.46932	1.08562	0.5342
282	0.955	1.36014	0.805547	0.64115
283	0.923	1.21471	0.90014	0.361743
284	0.521	0.831794	0.122885	0.185243
285	0.58	1.08187	0.320564	0.0402192
286	1.029	1.29806	0.52635	0.64273
287	0.725	1.38906	0.662543	0.604933
288	0.818	1.27237	0.35343	0.512583
289	0.58	1.14363	0.40317	0.471744
290	0.647	1.1989	0.586586	0.606859
291	0.902	1.38521	0.728736	0.836066
292	1.271	1.54545	0.91295	1.12453
293	1.298	1.71072	1.08254	1.26825
294	1.435	1.67199	0.940955	1.16325
295	1.12	1.50599	1.18004	1.1306
296	1.195	1.33314	0.748975	0.726085
297	0.651	1.1088	0.857527	0.538277
298	1.23	1.05253	0.646616	0.739166
299	0.481	0.948069	0.685422	0.392107
300	1.331	1.31041	1.10342	0.834457
301	1.335	1.69464	1.36608	0.92462
302	1.82	2.08708	1.87487	1.4709
303	2.279	2.57148	2.27797	1.9747
304	3.279	3.06993	3.31263	2.74796
305	2.746	3.10588	2.8576	2.35876
306	3.372	3.75861	3.74704	3.46544
307	4.936	4.5072	4.94059	4.10251
308	4.764	5.62163	5.17142	5.13113
309	6.892	6.25078	6.80679	6.26794
310	5.722	6.757	6.03731	6.0335
311	7.35	6.90964	7.21448	6.79343
312	6.132	6.44445	6.14507	6.01392
313	4.898	5.06756	5.04743	4.5971
314	4.349	4.52912	4.31222	4.19038
315	3.078	3.38655	3.40995	2.90025
316	2.249	2.37232	2.51402	2.04425
317	2.792	2.58478	2.9413	2.32543
318	3.926	3.86528	3.76264	3.68726
319	4.319	4.10442	4.30782	3.7206
320	5.099	5.40603	4.75943	4.68813
321	6.445	6.20413	6.21553	5.78644
322	6.891	6.74614	6.57696	6.52329
323	7.589	7.47917	7.13644	7.1168
324	9.625	9.48899	9.66905	9.11619
325	10.188	10.435	9.95745	9.50017
326	11.334	11.8259	11.5032	10.8948
327	13.368	12.8876	12.8846	12.2785
328	12.963	13.3787	13.0567	12.5962
329	13.693	13.6674	13.3675	12.7507
330	15.26	15.3051	15.0407	14.6384
331	19.586	20.1105	19.6119	19.3879
332	27.964	28.5537	27.959	27.5104
333	33.47	33.771	33.1397	33.0634
334	32.67	33.8958	32.7411	32.4542
335	34.95	34.803	34.7243	34.492
336	36.675	37.6956	36.3033	36.4686
337	40.471	41.0538	40.4996	40.0412
338	42.748	43.0346	42.1819	42.5322
339	42.764	44.3323	43.1694	42.7125
340	43.84	44.4235	43.1986	43.6649
341	43.484	43.8508	43.6198	43.0834
342	43.366	43.838	42.7542	43.1897
343	43.415	43.7314	43.5727	42.6768
344	43.816	43.9524	43.0837	43.3484
345	44.761	44.6953	44.4919	43.9843
346	44.323	44.4537	43.8002	43.8219
347	43.676	43.5613	43.0033	42.1568
348	43.077	44.0426	42.7544	42.6187
349	43.374	42.9085	42.337	41.8304
350	42.051	42.9166	41.8443	41.7205
351	44.643	44.2383	43.8799	43.3293
352	44.965	45.367	44.1881	44.746
353	45.106	45.3712	44.2305	43.809
354	44.813	45.3554	44.1677	44.3733
355	44.092	44.77	43.3382	43.0334
356	44.92	45.2205	44.1509	44.2526
357	44.897	45.4189	44.3165	44.2807
358	45.581	45.3863	44.696	44.6319
359	44.177	44.691	43.6277	43.2762
360	43.927	44.7105	43.5449	43.1166
361	45.144	45.0894	44.5269	43.7565
362	45.729	46.3505	45.2947	44.8932
363	45.936	46.6669	45.3492	45.1126
364	45.905	46.6134	45.4922	45.4631
365	45.802	46.5638	45.5596	44.9613
366	45.857	47.0425	45.7567	45.5043
367	45.883	46.9777	45.5232	45.3421
368	45.522	46.6794	44.8549	45.2031
369	45.828	46.5954	44.8721	45.1615
370	45.78	46.7866	45.3946	45.5982
371	45.922	46.9152	45.1766	45.3322
372	45.64	46.5693	45.1028	45.0453
373	45.675	46.2515	44.8526	44.8396
374	45.978	46.5882	45.3326	45.24
375	45.842	46.8793	45.6728	45.3159
376	45.758	46.5607	45.4183	45.3771
377	46.043	46.3617	45.508	44.8526
378	45.763	46.5701	45.133	44.9639
379	45.962	46.6358	45.3232	44.94
380	45.692	46.7688	45.7075	45.7939
381	45.987	46.2608	45.0653	44.4252
382	45.134	45.818	44.8594	44.2647
383	45.581	45.8003	44.9168	43.6091
384	45.916	46.2328	45.5686	45.1762
385	45.574	45.8389	45.1512	43.715
386	45.822	46.4772	46.0575	45.3047
387	45.384	45.6567	44.8599	43.1554
388	42.891	44.1309	43.0032	42.333
389	43.841	43.1849	43.1015	41.6792
390	41.447	44.0863	42.1694	41.5163
391	41.761	40.9881	40.4074	39.7531
392	32.591	36.1452	33.4239	33.1142
393	35.173	33.0862	33.6532	33.0262
394	27.311	29.186	27.5682	27.3932
395	21.593	21.8715	21.3016	20.6924
396	16.707	18.3073	16.3863	16.7905
397	21.908	21.788	22.2106	21.2104
398	26.453	26.3176	25.7793	25.8002
399	20.816	22.664	21.3689	20.5105
400	16.517	16.857	16.3053	16.4173
401	14.473	14.869	15.4064	13.7931
402	17.506	18.7236	17.4878	16.881
403	21.194	20.8784	21.4999	20.7738
404	18.413	17.8777	18.0118	17.7699
405	13.643	14.5779	14.1434	13.5337
406	12.424	12.4683	12.0546	11.6136
407	9.08	8.99707	8.96297	8.43827
408	8.076	7.5133	8.19572	7.67252
409	9.49	9.22547	9.89087	8.45005
410	13.006	13.0764	13.4447	13.1909
411	13.876	13.3572	13.8284	12.3455
412	14.592	15.8121	15.1584	14.8237
413	19.593	18.4824	19.5033	18.0649
414	20.727	21.3969	20.4607	20.4186
415	19.588	20.0124	19.5952	19.0344
416	19.754	19.1773	19.5233	19.0743
417	15.964	17.6142	16.8339	15.9714
418	17.433	17.6955	17.8385	17.2609
419	15.105	15.5554	15.4103	14.9293
420	13.816	14.3777	14.0724	13.7474
421	15.006	14.6224	15.5319	14.0503
422	15.565	16.4101	15.9335	15.8113
423	14.883	14.7988	15.0824	14.3317
424	14.179	15.2185	14.4319	14.0915
425	15.125	15.0913	15.6391	14.6905
426	13.439	13.9803	13.2042	12.913
427	10.682	10.6503	10.7635	10.0444
428	7.911	7.82674	8.12861	7.61292
429	4.35	5.18663	5.17399	4.38086
430	3.97	4.15334	4.14126	3.48567
431	3.184	3.28491	3.50153	3.06225
432	2.724	2.60699	2.77535	2.33969
433	2.559	2.95203	3.20912	2.8292
434	4.641	4.9044	4.12862	3.89021
435	4.81	5.0613	5.3982	4.73415
436	4.075	4.54258	4.08517	3.8823
437	3.698	3.9944	4.51792	3.82399
438	4.148	3.79597	3.91009	3.46903
439	3.214	3.57638	3.23356	2.38829
440	5.922	6.17962	5.95997	5.48452
441	6.457	7.29335	6.52167	5.921
442	4.732	4.45841	4.64923	3.9625
443	0.85	1.85043	1.38912	1.15542
444	1.991	2.88544	2.59278	2.21266
445	4.674	4.90508	5.17393	5.08683
446	4.727	6.74779	5.8481	5.6098
447	6.311	5.64789	6.1477	5.5778
448	1.654	2.95028	1.39153	1.38396
449	3.403	3.04802	3.36029	3.15421
450	5.634	5.49758	5.51289	5.3775
451	6.168	7.3273	6.42598	6.00336
452	10.012	9.39113	10.2723	9.43667
453	7.021	8.15489	7.46685	6.30069
454	5.403	5.52662	5.20235	4.44226
455	5.862	4.95711	6.24931	4.94063
456	4.315	4.73768	4.93002	4.16386
457	4.124	3.97471	4.61575	3.52912
458	2.702	3.97283	3.17267	2.44937
459	5.996	5.77591	6.13919	5.61658
460	7.081	8.11483	7.10621	6.71548
461	7.239	7.1377	6.97311	6.39892
462	4.289	4.78152	4.2446	4.10864
463	4.758	4.37208	4.62864	3.5275
464	6.791	7.04176	6.8113	6.26443
465	8.802	8.64438	8.94713	7.37901
466	7.725	7.882	7.68466	7.23516
467	6.467	6.77337	6.37122	5.16927
468	5.134	5.55466	4.92145	4.51141
469	2.87	3.90059	3.56779	2.82658
470	4.417	4.59882	4.05587	3.85548
471	3.622	5.13334	4.44751	3.88457
472	3.542	4.1242	3.47046	3.38765
473	3.139	3.46251	3.27488	3.02434
474	2.351	3.11789	2.46553	2.35849
475	2.425	2.3935	1.96942	1.54507
476	0.81	1.23663	0.558697	0.730811
477	0.193	0.548448	0.0606103	0
478	0	0.126596	0	0
479	0	0.601231	0	0
480	0.026	0.488128	0.055927	0
481	0	0.524356	0	0
482	0	0.265216	0	0
483	0	0.567483	0.0630665	0
484	0	0.124267	0.0504212	0
485	0	0.19873	0.0659909	0
486	0	0	0	0
487	0	0.109113	0	0
488	0.068	0.136772	0	0
489	0	0.0739192	0	0
490	0	0	0	0
491	0.085	0	0	0
492	0.117	0.0698492	0	0
493	0.156	0.207517	0	0
494	0.109	0.366634	0	0
495	0.118	0.202498	0	0
496	0.04	0.0010721	0	0
497	0.046	0.0913303	0	0
498	0.007	0.34614	0	0
499	0	0.23357	0	0
500	0	0.0971331	0	0
501	0	0.0306846	0	0
502	0.054	0.0197781	0	0
503	0	0.0632491	0	0
504	0.026	0.119701	0	0
505	0.173	0.251902	0	0
506	0.2	0.442293	0	0
507	0.075	0.494641	0	0
508	0.055	0.3924	0	0
509	0.094	0.344761	0	0
510	0.093	0.173385	0	0
511	0.084	0.278732	0	0
512	0.137	0.404358	0	0
513	0.261	0.444375	0.0711296	0
514	0.136	0.129034	0	0
515	0.042	0	0	0
516	0.111	0	0	0
517	0.109	0.0267007	0	0
518	0.118	0.195202	0	0
519	0.241	0.232096	0	0
520	0.056	0.0328777	0	0
521	0.077	0	0	0
522	0.058	0	0	0
523	0.082	0	0	0
524	0.116	0	0	0
525	0.055	0	0	0
526	0	0	0	0
527	0	0	0	0
528	0	0	0	0
529	0	0	0	0
530	0	0	0	0
531	0	0.000144772	0	0
532	0	0	0	0
533	0	0	0	0
534	0.018	0.0481072	0	0
535	0.102	0.0375277	0	0
536	0.187	0.150887	0	0
537	0.24	0.0983046	0	0
538	0.331	0.342899	0	0
539	0.306	0.307031	0	0
540	0.556	0.518555	0.213719	0
541	0.883	0.934691	0.651704	0.0859678
542	2.081	1.91267	1.62211	1.29104
543	1.331	1.61698	1.42518	0.842654
544	0.899	0.884233	0.500141	0.0702789
545	0.405	0.344897	0.312846	0
546	0.453	0.481898	0.375198	0
547	0.73	0.610548	0.629193	0
548	0.799	0.783937	0.652034	0.169418
549	0.517	0.562875	0.405607	0
550	0.311	0.372378	0.0543281	0
551	0.189	0.100145	0	0
552	0.203	0.289063	0.225372	0
553	0.952	0.644671	0.765497	0.07759
554	1.035	1.17588	1.02708	0.701405
555	1.141	1.29936	1.08301	0.624721
556	1.014	1.03072	0.837436	0.574306
557	0.777	0.678643	0.72069	0.280495
558	0.636	0.69823	0.613331	0.385327
559	0.549	0.785248	0.430888	0.0112947
560	0.804	1.10033	0.841266	0.713991
561	1.315	1.26576	1.33656	0.994846
562	1.099	1.27014	0.961474	0.75315
563	0.596	0.984478	0.744143	0.354807
564	1.186	1.33942	1.27192	1.00202
565	1.516	1.69488	1.59877	1.31995
566	2.092	2.61542	2.06089	2.00616
567	2.384	2.74321	2.42621	2.19713
568	2.076	2.44743	2.0223	2.07673
569	1.933	1.91024	1.97071	1.68514
570	1.746	1.92591	1.59327	1.15598
571	1.247	1.45774	1.1249	0.584605
572	1.554	1.68416	1.44962	1.2862
573	2.405	2.4326	2.2713	1.99239
574	2.693	2.92026	2.77548	2.2612
575	3.758	3.70949	3.6434	3.39971
576	4.975	5.39622	5.12167	4.99249
577	6.533	6.02109	6.59055	5.83309
578	6.239	7.47695	6.40228	6.37388
579	7.995	7.66808	7.81106	7.2362
580	6.952	7.57836	6.83593	6.76941
581	11.827	11.5738	11.9174	11.2441
582	15.915	14.5538	15.2515	14.8385
583	8.302	11.3	9.07285	8.53141
584	9.841	10.2459	9.83544	9.19982
585	12.091	12.2272	12.4273	11.3414
586	12.462	13.3264	12.9013	12.4065
587	12.058	12.0843	11.8031	10.7832
588	9.487	9.73523	9.58033	9.02821
589	10.695	10.6867	10.7099	9.93441
590	13.336	14.3963	13.4627	12.9651
591	13.114	12.8852	12.2152	11.9979
592	8.074	8.98556	8.26552	7.97356
593	8.388	7.35355	7.41188	6.79979
594	6.141	6.96524	6.53344	5.99886
595	6.633	5.89752	6.11066	5.59309
596	6.064	6.89771	6.55131	6.06592
597	8.892	8.50064	8.20041	7.83923
598	6.37	7.77012	6.46052	6.25427
599	7.158	6.30295	6.72999	6.14033
600	5.901	6.76803	5.83773	5.6894
601	6.417	6.69806	6.4788	6.12179
602	5.34	6.14227	5.18159	4.90129
603	5.198	5.27537	5.73472	5.28742
604	4.375	5.30837	4.09598	4.06137
605	7.35	6.65725	6.92031	6.3523
606	5.837	6.32853	5.43832	5.8533
607	4.41	4.57396	4.30302	3.89711
608	4.849	4.68634	4.26883	4.24404
609	3.458	4.33897	4.19923	3.2567
610	4.035	3.54034	3.75556	3.89609
611	3.395	3.92856	3.6512	2.83156
612	7.015	7.77044	7.00081	7.09038
613	10.98	10.7873	11.0029	10.1229
614	10.162	10.1629	10.1031	9.8178
615	6.16	7.1354	6.59225	6.00766
616	6.754	7.06926	6.93931	6.76754
617	6.627	6.69957	6.58434	5.94386
618	4.767	5.16855	4.93705	4.5378
619	3.938	3.89929	3.71753	3.30886
620	2.986	3.43319	2.96553	2.93212
621	2.459	2.49011	2.54639	2.32298
622	2.162	2.51793	2.08048	2.08336
623	1.926	2.01134	1.90909	1.63608
624	1.054	1.35188	1.37245	1.20583
625	0.479	0.563758	0.71139	0.334468
626	0.842	0.801665	0.833913	0.454318
627	0.698	0.967134	1.39024	1.05925
628	0.503	0.772232	0.313294	0.458598
629	0.31	0.5171	0.65556	0.22783
630	0.528	0.524983	0.178227	0.112263
631	0.487	0.527655	0.518165	0.272927
632	1.275	1.01188	0.791237	0.954604
633	0.531	1.10158	0.693929	0.633461
634	1.417	1.56447	1.48852	1.39503
635	2.211	2.30699	2.7713	2.40299
636	2.526	3.04357	2.35416	2.53776
637	3.01	3.1255	3.42942	2.7754
638	3.306	3.51821	3.08153	3.10693
639	3.206	3.66118	3.57966	3.16749
640	4.634	4.55136	4.24528	4.28821
641	3.17	3.9528	3.46657	3.16999
642	3.511	3.90481	3.48349	3.0368
643	5.586	5.745	5.82762	5.66924
644	6.622	6.94063	6.56106	6.6091
645	4.465	5.15751	4.88738	4.40108
646	2.06	2.24052	1.62005	1.54205
647	0.452	1.15287	0.666509	0.610151
648	2.211	1.90403	2.42429	1.90583
649	4.609	4.89444	4.74754	4.64121
650	10.615	10.8041	10.3222	10.3798
651	12.553	12.7782	12.1316	12.0318
652	8.394	9.52712	8.59335	8.24342
653	6.535	5.97707	6.55394	6.16587
654	3.587	3.79217	3.72074	3.09762
655	2.235	2.82948	2.56179	2.17522
656	2.405	2.53011	2.53425	2.01965
657	1.852	2.37358	2.06358	1.61924
658	1.441	1.72853	1.1321	0.525105
659	0.814	0.765638	1.14442	0.688869
660	0.422	0.711274	0.671845	0.659457
661	0.67	0.698515	1.10533	0.481232
662	1.719	1.52654	1.89868	1.2064
663	1.926	2.09414	2.18752	1.48783
664	2.385	2.36982	2.40756	2.03206
665	2.294	2.45366	2.73429	2.21349
666	2.465	2.69089	2.25603	1.8584
667	1.314	1.48412	1.53271	0.706721
668	0.166	0.532908	0	0
669	0	0.187604	0	0
670	0	0	0	0
671	0	0	0	0
672	0	0	0	0
673	0	0	0	0
674	0	0.097665	0	0
675	0	0	0.152489	0
676	0	0	0	0
677	0	0.0529713	0	0
678	0	0.335403	0	0
679	0	0.23384	0	0
680	0	0.400233	0	0
681	0	0.505497	0	0
682	0	0.394078	0	0.155543
683	0	0.157773	0.0364995	0
684	0	0.317034	0.121624	0
685	0	0.242323	0.166224	0
686	0	0.278949	0	0
687	0	0.103756	0	0
688	0	0.13449	0	0
689	0	0	0.0808981	0
690	0	0.177891	0.237046	0
691	0	0	0.330035	0
692	0	0.159451	0.145231	0
693	0	0.155457	0.0138189	0
694	0	0	0	0
695	0	0.0167747	0	0
696	0	0.242336	0	0
697	0	0.104734	0.0345344	0
698	0	0.161635	0.0340202	0.0951087
699	0.39	0.190924	0.210403	0
700	0.591	0.170549	0	0.0198905
701	1.638	0.964499	0.965814	0.414403
702	3.203	2.46068	2.5742	2.51009
703	3.671	3.78799	3.90235	3.39162
704	5.657	5.25926	5.56122	4.98198
705	4.072	4.6086	4.57108	3.84985
706	2.579	2.32634	2.39483	2.10076
707	1.944	2.05029	1.96944	1.51798
708	2.63	2.25646	2.83718	2.30445
709	2.922	3.05949	2.72532	2.7516
710	3.935	4.06905	4.06572	4.03495
711	5.841	5.45627	5.43865	5.30904
712	6.771	7.35072	6.88722	6.96301
713	10.122	9.33504	9.48181	9.28314
714	11.708	12.3902	11.5817	11.4211
715	16.811	16.5368	16.3735	15.9963
716	17.507	17.8671	17.3009	16.9556
717	13.222	14.7049	13.4067	12.9768
718	8.454	9.34963	8.73812	7.97565
719	4.16	5.53854	5.00044	4.55946
720	2.461	3.44911	2.97803	1.99352
721	1.582	2.75357	2.18208	1.78764
722	1.921	2.62359	1.99796	1.7054
723	1.287	2.55038	2.02402	2.18973
724	1.632	1.90371	1.81107	1.38677
725	1.952	1.96778	2.2546	1.72816
726	4.512	4.30578	4.59162	4.43637
727	6.283	6.44269	6.12263	5.20273
728	8.252	7.64537	8.0259	7.29751
729	9.29	9.51654	9.12744	8.53627
730	12.852	12.7708	13.1462	12.3403
731	14.338	14.8835	14.1234	12.9758
732	14.48	15.3225	15.0751	14.0976
733	15.146	15.3613	14.993	13.8018
734	14.406	15.1255	14.6948	14.119
735	12.556	13.3457	12.979	12.218
736	9.814	11.2953	10.2715	10.0292
737	9.356	9.45115	9.57897	9.00085
738	6.392	7.61722	6.74102	6.33885
739	7.105	7.36878	7.25186	6.83565
740	9.796	10.963	10.0855	10.2661
741	11.126	11.7659	11.2684	10.9896
742	8.91	9.75748	9.2419	8.88823
743	5.577	6.49021	6.31658	5.50144
744	4.03	4.62369	4.18305	4.09342
745	3.69	4.36021	4.58695	3.98607
746	4.048	4.36134	4.13188	4.02322
747	2.33	3.52719	2.94611	2.85291
748	2.882	3.50443	2.76838	2.87698
749	3.732	3.98468	4.18474	3.77614
750	4.407	5.0599	4.51222	4.76889
751	3.623	4.26766	3.67214	3.52313
752	3.555	3.45115	3.27403	3.35303
753	5.827	5.95337	5.86494	5.51456
754	10.302	9.62443	10.356	9.76842
755	7.635	8.23349	7.69621	6.93998
756	6.306	7.37519	6.66471	6.23816
757	11.529	10.0044	11.1944	10.5617
758	11.482	12.1542	11.8815	11.4427
759	11.245	11.4688	11.2754	10.8129
760	10.312	10.9385	10.0324	10.0311
761	11.415	12.4395	11.7903	11.5346
762	12.197	12.9804	12.3871	12.2641
763	11.959	12.7697	12.01	12.1182
764	14.031	13.8731	13.725	13.9675
765	15.592	16.1485	15.7461	15.3173
766	20.085	20.7797	19.4085	19.5861
767	24.472	23.9904	23.7925	24.0645
768	24.264	24.9746	23.7673	24.0833
769	25.797	26.4473	25.3574	25.4615
770	25.912	26.0126	25.1182	25.6813
771	19.962	22.2233	20.1912	19.8171
772	19.003	18.7337	18.5375	18.153
773	13.277	15.1801	14.0133	13.5053
774	11.743	12.7711	12.155	11.6474
775	10.72	10.5925	10.9238	10.0935
776	6.413	7.76719	6.77797	6.10849
777	3.844	5.12129	3.84078	3.16904
778	1.39	3.25617	1.9155	1.0064
779	0.062	2.30628	0.530766	0.192542
780	0	0.87292	0	0
781	0	1.08139	0.133074	0
782	0	0.120726	0	0
783	0	0.035403	0.0669878	0
784	0	0	0	0
785	0	0	0.35064	0
786	0	0	0	0
787	0	0	0.261156	0
788	0.112	0.426168	0.384948	0.181625
789	0.059	0.136424	0.372814	0
790	0	0	0	0
791	0	0	0	0
792	0	0.00606656	0	0
793	0.076	0	0	0
794	0.156	0.55077	0.0587351	0
795	1.333	1.27128	0.630275	0
796	1.833	2.45056	1.68621	1.74834
797	1.306	1.78876	1.4674	1.50602
798	1.193	1.7241	0.655623	0.78654
799	1.565	1.45951	1.44443	1.1811
800	1.297	1.91192	1.41551	1.32265
801	1.028	1.13983	1.42611	0.86567
802	0.391	0.701162	0.153081	0
803	0.434	0.410607	0.693956	0
804	0.596	0.478722	0.125047	0.228163
805	0.522	0.273182	0.934849	0.185489
806	1.253	1.00997	1.16275	0.933331
807	1.594	0.826899	1.96181	0.977851
808	2.263	2.44101	1.903	2.81227
809	6.54	5.41668	5.92559	5.86642
810	10.858	10.7888	9.61289	10.2916
811	17.292	17.2802	16.9717	16.9187
812	24.453	23.674	23.3285	23.712
813	25.447	27.0972	25.0648	25.9282
814	30.666	30.68	29.8646	30.5002
815	31.313	32.269	30.3393	31.1751
816	32.418	32.3594	30.9962	31.9143
817	34.529	34.4338	33.521	33.9157
818	37.3	37.2073	35.7989	36.5545
819	38.27	38.3586	37.1737	37.2251
820	37.096	37.806	35.8982	36.4024
821	38.133	37.5583	36.7519	37.1976
822	37.449	37.5028	36.3586	36.8558
823	37.708	38.1483	37.0712	37.0771
824	39.986	40.7272	39.6009	40.1485
825	43.214	43.0894	42.6375	42.5621
826	40.636	42.1647	40.325	40.7052
827	42.079	41.6303	41.1593	41.3503
828	40.753	42.3925	40.4992	41.1335
829	42.787	42.5794	41.6312	41.7085
830	39.524	40.7311	38.7057	38.8911
831	39.825	40.496	39.5605	39.2781
832	41.4	40.6933	40.0182	40.4034
833	39.303	41.0474	39.7131	39.4756
834	42.113	42.3849	41.4012	41.4243
835	41.517	41.8623	40.8422	40.4204
836	38.722	39.0761	38.2134	37.6726
837	37.776	37.5068	37.4661	36.4497
838	37.874	37.9548	37.288	36.8184
839	34.587	35.0462	34.1398	33.1046
840	31.074	31.392	30.3412	29.8956
841	31.838	31.8323	31.0737	30.2704
842	35.721	35.3472	35.3107	34.8092
843	35.009	35.5829	34.879	33.494
844	35.744	36.192	35.5562	35.0756
845	37.147	37.5055	36.9705	35.2291
846	37.238	37.0599	37.121	36.3237
847	33.91	34.7863	33.7239	32.4083
848	34.262	35.0422	34.1886	33.4145
849	35.793	37.0303	35.8978	34.5716
850	35.78	35.7676	35.6804	34.6275
851	30.198	31.478	30.1052	29.6042
852	28.598	29.7678	28.8729	27.8986
853	27.208	27.7428	27.243	26.2086
854	23.348	24.8005	23.445	22.9012
855	26.813	26.4383	26.6481	26.0489
856	28.793	28.7397	28.5938	28.5454
857	24.573	26.5621	24.8526	24.2688
858	23.545	25.1942	23.6946	23.8138
859	24.537	25.1448	24.6993	24.4978
860	25.258	25.8719	25.4671	25.2643
861	25.262	25.7288	24.9243	25.0309
862	25.565	26.1562	24.9653	25.3944
863	25.133	25.8357	25.0816	24.9104
864	23.74	23.5052	23.0886	23.1491
865	19.467	20.0963	19.2802	19.493
866	19.753	20.5072	19.6375	19.8036
867	23.618	23.0688	23.465	23.0083
868	25.948	26.8422	25.6404	26.0534
869	26.973	27.103	26.6615	26.5411
870	26.34	28.3605	26.2748	26.6853
871	30.76	30.3312	30.1436	30.0807
872	29.199	30.3676	29.1131	29.5337
873	28.301	29.6722	28.3363	28.1738
874	30.951	31.548	31.011	31.1235
875	31.084	32.3468	30.9041	31.0748
876	29.086	31.1256	29.4725	29.3998
877	29.088	29.4303	29.5906	29.1989
878	26.507	27.7586	26.3238	26.7776
879	27.774	27.9404	27.7489	27.4678
880	28.209	29.4971	28.0102	28.5414
881	28.567	30.176	28.566	28.7408
882	30.051	29.6682	29.2219	29.3929
883	26.959	28.4874	27.047	27.2519
884	26.431	26.4112	26.4393	26.1106
885	22.909	23.2233	22.619	21.7034
886	21.367	22.2935	21.4635	21.1128
887	23.312	22.2719	23.0114	21.8371
888	18.789	19.8873	18.9793	19.0527
889	18.447	18.0046	17.9511	17.3216
890	16.506	16.3694	15.878	16.0647
891	15.977	16.6182	15.9584	15.422
892	19.922	19.926	19.6295	19.3335
893	17.497	18.0248	17.1236	16.5271
894	12.019	12.3124	12.1032	11.4924
895	10.959	9.89511	11.2587	9.51796
896	10.03	10.2662	10.5322	9.90826
897	9.358	9.44352	9.77956	8.34558
898	9.15	10.2244	9.60021	9.16336
899	11.543	12.1026	12.4833	11.2758
900	13.033	13.1947	12.3052	12.3628
901	9.367	10.2101	10.4115	9.63343
902	7.919	8.54728	8.005	8.08753
903	6.08	6.76725	7.04135	5.68052
904	5.343	5.59773	5.68732	5.27451
905	3.77	4.26008	4.36959	3.63277
906	4.323	4.34198	4.64821	4.2087
907	4.092	4.01475	3.90327	3.14444
908	3.774	4.24789	3.89805	3.22756
909	3.326	2.75028	3.10158	2.20603
910	3.155	2.64595	2.89047	2.10579
911	3.104	2.47402	3.02757	1.94381
912	2.651	1.88401	1.84756	1.1861
913	1.872	1.40219	1.50892	0.476528
914	1.408	1.33879	1.7939	0.671083
915	1.193	0.994174	0.866306	0.283427
916	0.866	1.64788	0.97615	0.718289
917	0.517	0.83336	1.23716	0.627856
918	0.317	0.500264	0.137844	0.198961
919	0.322	0.599116	0.190818	0.0974848
920	0.335	0.438361	0	0.590168
921	1.75	1.87882	1.4852	2.10475
922	4.244	3.73856	3.52934	3.41203
923	2.722	3.63789	2.94564	3.20318
924	3.94	4.43784	4.04785	3.98969
925	6.744	6.1663	6.13325	5.84475
926	8.874	10.4699	9.39528	8.81022
927	13.805	13.556	13.4447	12.7244
928	12.251	14.127	12.8793	12.3896
929	15.106	15.4113	14.653	14.8895
930	13.72	15.3086	14.1161	13.8532
931	13.728	14.5134	14.3976	13.8164
932	12.458	12.617	12	12.2415
933	8.672	9.50112	8.99165	9.07988
934	8.989	11.1952	8.81893	9.37672
935	18.117	17.557	18.0085	17.1702
936	20.652	21.1415	20.1869	20.2735
937	21.838	23.0412	21.8377	21.683
938	22.967	23.9272	22.5134	22.5754
939	22.079	23.4168	22.2778	22.3608
940	20.369	20.49	20.1685	20.0073
941	15.282	16.2292	15.8196	15.5915
942	12.878	13.4555	12.5583	12.5782
943	15.788	15.4843	16.1611	14.7889
944	16.832	16.5693	15.9638	16.1343
945	20.621	21.6215	21.7261	20.14
946	31.068	30.4771	30.3819	30.9567
947	32.256	34.3363	31.5279	31.5765
948	34.024	34.1366	33.654	33.6276
949	35.154	35.5587	34.4575	34.2713
950	37.321	36.4295	36.8295	36.5195
951	36.032	36.5279	35.9128	35.4925
952	35.851	36.6523	35.8959	35.2718
953	36.16	35.9677	35.6579	34.2729
954	31.817	32.9268	31.856	31.3347
955	26.619	26.7387	26.0589	24.6966
956	23.838	24.5588	23.2585	23.0719
957	22.443	23.6898	22.57	21.5871
958	22.096	21.1779	21.1248	20.9383
959	16.63	18.3198	17.521	16.4487
960	17.824	16.3964	17.2795	16.714
961	13.878	15.1116	15.025	13.4634
962	17.884	17.9544	17.7376	16.7888
963	20.435	20.3559	20.0297	18.9211
964	22.353	22.6842	22.0425	20.9628
965	26.694	26.9644	26.4145	25.8041
966	30.744	31.3586	29.7683	29.966
967	36.745	37.3274	36.456	35.9158
968	41.198	42.2053	40.6157	40.9381
969	43.196	43.9916	42.3661	42.1868
970	40.196	41.1331	39.8243	40.4912
971	39.204	39.8595	39.1866	38.6658
972	41.323	41.9149	40.4537	41.2088
973	43.403	44.5129	43.536	43.1807
974	42.392	42.8773	41.8763	42.73
975	40.973	42.5565	40.9854	41.1558
976	46.739	46.6749	45.5694	45.8419
977	47.047	48.224	47.0721	47.3724
978	46.98	47.4323	46.5497	46.3409
979	47.398	47.5115	46.9736	47.0211
980	47.464	47.5004	46.4917	46.7351
981	46.853	47.543	46.7221	46.8972
982	46.96	47.8906	46.8034	47.2958
983	47.277	48.6552	46.8684	47.1697
984	47.438	49.0252	47.5852	48.5633
985	47.492	48.2171	46.4637	47.1721
986	46.769	47.6628	46.1149	47.2904
987	47.58	48.0794	47.129	47.1082
988	47.333	48.1697	46.3588	47.4029
989	47.532	47.9217	46.7666	47.0557
990	46.458	46.9682	45.7568	45.9896
991	45.122	46.5081	45.1154	44.9642
992	46.682	48.2386	46.4308	46.5159
993	47.589	49.1025	47.141	47.5131
994	47.323	48.4041	47.0325	47.0911
995	46.567	48.1108	46.267	46.6771
996	47.633	48.3423	47.0215	47.3602
997	47.423	47.967	46.7813	46.5947
998	46.991	47.5669	46.6238	46.2566
999	47.457	47.2969	46.7352	46.0125
1000	46.406	46.9381	46.1475	45.9699
1001	46.917	46.7832	46.4033	45.8449
1002	47.574	47.7466	46.4405	46.1942
1003	47.561	48.0753	46.8495	46.1777
1004	47.635	48.3516	47.0495	46.9599
1005	47.538	48.492	46.9772	46.4512
1006	47.502	48.5431	47.2543	46.909
1007	46.115	47.4141	45.9729	45.153
1008	44.913	45.9625	44.414	44.1924
1009	45.196	46.2372	45.1531	44.3531
1010	45.317	46.5139	45.0198	44.583
1011	45.389	46.7426	45.633	44.8435
1012	44.659	45.7994	44.2625	44.3311
1013	44.563	45.5201	44.1333	43.4626
1014	44.72	45.4778	44.294	44.0967
1015	44.52	45.2605	44.0898	43.4755
1016	44.825	45.4384	44.6817	44.3247
1017	45.445	45.406	45.1578	43.9142
1018	45.025	45.2661	44.4497	43.9396
1019	44.55	44.5303	44.4626	43.0389
1020	43.852	43.3563	43.2864	42.9035
1021	40.829	41.8081	41.2036	39.9347
1022	44.434	44.7652	44.2106	43.9851
1023	45.001	45.7111	45.1296	44.3077
1024	43.962	45.3789	43.6979	43.6828
1025	44.54	44.6741	44.2235	43.4302
1026	44.483	45.4354	44.2045	44.2014
1027	44.277	44.9802	44.0163	43.4281
1028	44.458	45.1597	43.9917	43.8915
1029	42.422	43.5147	42.2887	41.5223
1030	42.535	43.3894	42.3854	42.2653
1031	43.413	44.1208	43.4409	43.0616
1032	44.589	45.7753	44.1803	44.688
1033	44.172	44.8123	43.4745	43.3139
1034	41.355	42.317	40.7904	40.9449
1035	41.271	41.9493	40.8811	40.9609
1036	44.241	44.6531	43.6718	43.9913
1037	44.701	45.4134	43.9859	44.2092
1038	43.937	44.6923	43.3495	43.4377
1039	44.084	44.5171	43.7915	43.0472
1040	43.891	44.8117	43.5139	43.7218
1041	44.191	44.5735	44.1782	43.821
1042	44.737	45.7541	44.2809	44.7245
1043	45.353	45.9786	45.0561	44.5917
1044	43.259	43.7028	42.7322	43.3992
1045	40.394	41.2718	40.1699	40.2498
1046	42.671	43.3073	42.2107	42.2664
1047	42.212	43.3458	42.1494	42.0995
1048	39.841	39.814	39.0854	39.2795
1049	36.952	37.4191	36.8962	36.6791
1050	38.148	37.7098	38.0125	37.6034
1051	34.217	34.9109	33.9584	33.5428
1052	34.236	36.0312	34.4662	33.8848
1053	42.396	41.1752	41.9429	41.0489
1054	44.854	45.4642	44.3414	44.1598
1055	46.599	46.3194	46.0038	45.1875
1056	46.206	46.9138	45.2692	45.3469
1057	46.393	46.8898	45.7816	44.9424
1058	46.989	47.5022	46.3503	46.0961
1059	46.839	47.3609	46.2345	45.764
1060	47.283	47.3532	46.5479	47.0069
1061	47.135	48.0793	46.9448	46.3906
1062	47.532	48.2567	47.1082	47.0495
1063	46.76	47.0551	46.7208	46.2015
1064	46.596	47.1167	46.1064	46.1115
1065	47.355	47.3306	47.286	46.7921
1066	47.246	47.7506	46.6788	46.5577
1067	47.622	47.5708	47.2981	46.3919
1068	47.153	47.2123	46.3776	45.8414
1069	47.067	47.2009	46.5976	45.9622
1070	47.415	48.29	47.1362	46.9697
1071	47.129	47.5554	46.6525	45.8924
1072	45.709	46.3717	45.7099	45.3342
1073	45.287	46.1257	44.9789	43.9104
1074	45.629	46.5456	45.6829	45.9118
1075	44.491	46.1068	44.7736	44.2798
1076	45.134	45.7317	44.4418	44.9759
1077	45.059	45.9293	45.4253	44.8893
1078	45.426	46.6593	45.0035	45.7304
1079	44.162	44.4725	43.6627	43.4007
1080	41.598	42.9725	41.0817	41.3729
1081	43.084	43.0821	42.414	42.0467
1082	43.6	43.1395	42.4562	42.5362
1083	40.833	42.0632	40.118	40.0532
1084	40.83	40.8392	40.7941	40.3105
1085	36.538	37.6911	36.5388	35.8367
1086	33.677	34.8281	33.9999	33.4236
1087	35.353	34.5756	35.0952	34.2133
1088	35.481	36.0763	35.2649	35.1044
1089	37.77	37.8974	37.6754	36.9308
1090	38.641	40.7654	38.2788	38.3608
1091	43.256	43.3092	42.2596	42.1007
1092	43.12	44.6561	42.5609	42.5455
1093	45.342	46.0076	44.5397	44.6317
1094	46.725	46.9854	45.9808	46.0107
1095	43.902	45.4523	43.549	43.2538
1096	41.674	42.8046	41.5017	41.409
1097	42.668	42.9228	42.6895	41.7597
1098	42.187	43.1909	41.8822	41.9789
1099	42.975	43.3116	43.1127	42.1358
1100	41.029	42.6059	40.6798	40.7438
1101	40.586	41.469	40.6053	39.8859
1102	39.816	41.3648	39.6478	39.8173
1103	39.397	40.2045	39.1972	38.9229
1104	38.295	38.3419	37.4543	37.4663
1105	36.08	37.4513	35.792	35.3799
1106	37.394	36.6415	36.9648	36.7299
1107	33.929	35.2128	33.6755	33.1049
1108	35.973	36.2606	36.011	35.8757
1109	35.842	36.7333	36.1108	35.097
1110	36.225	36.2038	35.7086	35.8843
1111	34.921	35.8517	35.0109	34.0914
1112	36.258	37.172	36.43	36.5355
1113	36.202	37.1471	36.1153	36.0174
1114	34.515	35.7313	34.5525	34.3274
1115	33.721	34.3716	33.666	33.7729
1116	31.2	32.8161	31.7481	31.4697
1117	28.476	28.2582	27.5427	27.1572
1118	18.535	20.4687	19.3748	18.7029
1119	18.817	18.293	18.3963	17.6973
1120	21.549	22.9314	21.3972	21.6306
1121	28.945	28.6799	29.0437	28.3123
1122	31.32	33.9793	31.3617	31.7892
1123	36.093	36.0624	35.0577	34.6814
1124	32	32.827	31.2052	31.3516
1125	30.999	32.1405	31.8338	31.3697
1126	36.617	35.9562	35.8328	36.1541
1127	30.022	33.5971	31.1198	30.3373
1128	24.786	24.8831	24.6703	23.9462
1129	18.442	19.5992	19.3588	18.0707
1130	16.405	16.1188	16.3752	15.8882
1131	10.189	11.5564	10.778	9.63661
1132	7.414	8.01483	7.27242	7.0378
1133	6.782	7.06422	6.70811	5.93224
1134	6.629	9.3087	6.50477	6.40935
1135	7.078	8.61632	6.99226	6.12223
1136	5.425	6.04062	5.55976	5.7
1137	4.835	5.33246	4.94026	3.69012
1138	5.167	5.6401	5.66358	5.05504
1139	6.295	6.27311	6.18643	5.35374
1140	7.75	7.75493	8.41319	7.57301
1141	8.556	9.01054	8.98505	7.46142
1142	8.625	8.73888	8.7077	8.0947
1143	9.368	8.74951	8.97164	7.69966
1144	8.568	8.78664	8.44867	7.63087
1145	6.916	7.09947	7.33641	6.75467
1146	4.11	4.10253	3.88155	3.38279
1147	1.648	1.83983	2.6388	1.78747
1148	0.548	1.05503	0.717202	0.0947184
1149	1.376	0.869168	0.852696	0.234748
1150	0.819	1.24361	0.214462	0
1151	0.012	0.259061	0.0871904	0
1152	0	0	0	0
1153	0	0.0307575	0	0
1154	0.141	0.158868	0.10112	0
1155	0.07	0.111624	0	0
1156	0.031	0.171295	0	0
1157	0	0.530469	0.206395	0
1158	0	0.222643	0	0
1159	0	0.32872	0	0
1160	0	0.45019	0	0
1161	0	0.282252	0	0
1162	0	0	0	0
1163	0	0	0	0
1164	0	0	0	0
1165	0	0	0	0
1166	0	0.0597593	0	0
1167	0	0.335968	0	0
1168	0	1.07327	0.446212	0
1169	0.576	1.85715	0.897561	0.310307
1170	0.649	1.52392	0.95696	1.02479
1171	0.538	1.15352	0.884474	0.841115
1172	0.854	1.24566	0.754587	0.718938
1173	1.047	1.19553	1.38727	0.792561
1174	0.839	0.829976	0.481346	0.732377
1175	1.418	0.603293	1.02859	0.661346
1176	1.534	1.22307	0.674965	1.25952
1177	2.22	1.56911	1.49177	1.26452
1178	2.577	2.28986	1.50328	1.54602
1179	2.974	3.03673	2.48793	2.23518
1180	4.426	4.41384	3.94451	3.90993
1181	4.48	4.97855	4.13139	3.81597
1182	4.062	4.91608	4.39871	3.90882
1183	5.067	5.26763	5.0251	4.34679
1184	5.38	6.15668	5.75499	5.05745
1185	7.665	7.85365	7.50917	6.98349
1186	9.184	11.0557	9.40024	9.59409
1187	14.271	13.6724	13.7613	13.4813
1188	10.884	11.9693	10.8514	10.5401
1189	11.081	11.2989	11.6648	10.5425
1190	14.331	15.1227	13.6843	14.2429
1191	16.712	17.1987	16.4801	16.0339
1192	15.032	14.8279	14.7995	14.3792
1193	12.718	13.4198	12.7339	11.9867
1194	16.248	15.9568	15.5905	15.4064
1195	18.624	18.9113	19.0651	17.9982
1196	21.24	22.1279	21.2317	20.8268
1197	20.905	21.5083	20.9994	19.9343
1198	17.492	18.0775	16.9467	16.8368
1199	19.327	19.1762	19.4971	18.7287
1200	24.868	24.5801	23.7762	24.1596
1201	23.826	25.4281	23.6036	22.7852
1202	23.523	24.2476	22.6998	22.8104
1203	25.499	25.8899	24.5345	24.2661
1204	28.958	28.0314	28.1506	28.1141
1205	27.47	28.8427	27.1087	26.3341
1206	31.924	31.7007	31.3133	31.3609
1207	33.418	33.9986	32.6674	31.8831
1208	32.95	33.4288	32.4548	31.9821
1209	32.785	32.6035	32.1517	31.7803
1210	31.526	31.9967	30.3692	30.8676
1211	32.244	32.1446	31.4649	30.8561
1212	31.101	31.4517	30.488	30.0215
1213	29.986	30.1234	29.042	28.7947
1214	31.801	32.4891	31.4004	31.3142
1215	36.701	36.1617	35.9628	35.1307
1216	35.71	36.0395	34.7786	34.985
1217	34.278	34.8053	33.278	33.0165
1218	33.732	33.0507	32.8914	33.0581
1219	32.671	33.491	32.4315	31.8783
1220	37.209	36.716	36.1644	36.1216
1221	35.455	36.4695	35.1971	34.882
1222	33.847	33.6665	33.0726	33.0102
1223	34.162	33.9787	33.5229	32.8424
1224	36.411	37.3055	35.8534	35.609
1225	38.514	38.9987	38.1951	37.6225
1226	36.426	35.0274	35.4019	35.2143
1227	28.708	30.7241	28.6891	28.6195
1228	30.291	30.8783	30.3942	30.2781
1229	27.058	27.4383	26.1912	26.0625
1230	21.235	22.4801	21.2358	21.0658
1231	26.467	25.8441	26.3791	25.8647
1232	33.364	33.2316	32.1228	32.986
1233	34.855	36.1509	34.2252	34.9164
1234	35.185	36.3459	35.0103	35.4942
1235	35.983	37.0141	35.21	35.3736
1236	39.065	39.7657	38.1378	38.16
1237	42.55	42.6799	41.7819	42.0836
1238	43.32	43.7954	42.984	43.1714
1239	43.823	45.0066	44.0761	43.7674
1240	43.701	44.9098	42.8314	43.184
1241	46.022	45.5814	45.2735	45.3573
1242	45.902	46.7193	45.5045	45.5972
1243	46.311	47.1351	45.8212	45.5998
1244	46.674	47.6835	45.9438	46.6022
1245	47.282	47.7026	46.5238	46.777
1246	46.801	47.5839	46.026	46.2388
1247	47.189	47.8799	47.2287	47.1804
1248	46.378	47.0987	45.7097	46.1064
1249	45.103	45.9186	44.4049	44.7589
1250	46.832	47.3525	46.5631	46.5574
1251	46.522	47.89	46.0839	46.0681
1252	47.5	48.106	46.7644	47.0836
1253	46.071	47.7251	46.4416	46.2437
1254	46.7	47.4253	46.2719	46.4887
1255	46.611	47.4496	46.2628	45.9813
1256	46.934	48.0263	46.2676	46.9876
1257	47.135	47.4123	45.8056	46.2502
1258	45.903	46.6239	45.189	45.4066
1259	45.405	45.8209	44.7395	44.8804
1260	45.32	46.0317	44.5964	45.1111
1261	46.349	46.3822	45.0837	44.893
1262	46.389	47.3041	45.6969	45.6967
1263	46.255	47.2409	45.6458	45.4219
1264	46.197	46.542	45.5936	45.6935
1265	46.377	46.5003	45.487	45.1153
1266	47.166	47.7379	46.4608	45.9119
1267	47.458	47.9968	46.4107	46.6149
1268	46.525	47.3478	45.8984	45.6274
1269	46.138	46.7088	45.8392	45.4544
1270	44.589	45.5219	43.8343	43.7147
1271	41.554	43.059	41.9875	41.3618
1272	39.19	39.2522	38.592	38.5869
1273	36.195	38.1969	36.669	36.2528
1274	43.015	43.0153	42.1234	42.3045
1275	44.677	45.9662	44.1956	44.3012
1276	44.327	44.4106	43.4521	43.3335
1277	43.065	43.6178	42.788	41.6463
1278	44.689	45.017	44.0377	43.5066
1279	44.389	45.3451	44.3942	43.0119
1280	42.308	42.9634	42.5358	42.0702
1281	38.725	40.5044	38.6781	37.6116
1282	38.397	38.6708	38.3764	38.0113
1283	35.945	36.7815	36.0372	34.9783
1284	36.136	37.38	36.323	35.9787
1285	36.432	36.8274	36.4593	35.0024
1286	33.594	33.5724	33.3768	33.3499
1287	28.215	28.7527	28.3498	27.2573
1288	25.976	25.438	25.7782	25.5625
1289	19.276	20.5526	19.4117	18.5577
1290	18.035	17.8929	18.463	17.9127
1291	14.262	14.615	14.4746	14.2445
1292	13.098	13.8037	13.3392	13.0545
1293	11.742	11.4363	11.9061	11.4249
1294	9.623	10.8976	9.99273	9.96098
1295	11.124	10.499	11.5346	10.502
1296	9.462	9.78693	9.80525	9.46319
1297	8.944	9.0942	9.12385	8.34063
1298	9.927	10.3542	10.1797	9.92237
1299	8.433	8.97588	8.67587	7.85169
1300	6.079	7.4025	6.56631	5.92818
1301	8.104	7.34454	7.80748	7.54738
1302	8.505	9.75346	8.25834	8.88618
1303	12.128	12.0156	11.1294	11.72
1304	12.773	12.8023	12.5605	12.7811
1305	9.32	10.5771	9.59481	9.62111
1306	8.963	9.75137	9.43315	8.83518
1307	7.904	7.91135	8.60644	8.30278
1308	5.831	6.66752	6.20817	5.33786
1309	5.306	5.3148	6.07185	5.75305
1310	4.423	4.49621	4.16533	3.77216
1311	3.414	3.79395	3.2511	3.24648
1312	5.913	6.26682	5.4316	5.13719
1313	6.328	7.14343	6.54606	6.10987
1314	8	8.17619	7.51826	6.91646
1315	7.9	8.26432	7.683	7.2143
1316	8.729	8.1576	7.84072	7.65744
1317	8.519	8.98056	9.36905	8.1131
1318	14.276	13.5161	13.8887	12.9635
1319	17.611	18.379	17.9148	17.0581
1320	26.662	26.2623	26.2722	25.7632
1321	33.521	34.2434	33.381	32.9426
1322	41.13	41.0454	40.3309	40.8958
1323	39.413	41.8413	39.9584	39.7826
1324	39.333	39.0377	38.368	38.3015
1325	35.763	37.2732	36.5747	35.5093
1326	36.757	35.1635	35.54	35.4353
1327	31.052	32.8117	31.8067	30.4013
1328	33.822	33.0653	33.5609	33.1406
1329	34.516	34.753	34.7439	33.5909
1330	37.383	37.9269	36.561	36.6661
1331	41.911	41.2482	41.8833	40.6137
1332	43.051	42.4485	42.205	42.1002
1333	41.865	42.4375	41.2876	40.668
1334	43.021	42.6381	42.385	41.7741
1335	41.73	42.2045	40.5832	40.08
1336	41.913	42.0997	41.6106	40.8133
1337	43.759	43.3941	43.1983	42.3019
1338	43.284	44.0446	43.0643	42.6697
1339	44.344	44.3573	43.5281	42.8001
1340	43.944	44.6956	43.3054	43.5194
1341	43.491	44.0269	42.5105	42.7126
1342	41.541	43.3957	41.3061	41.4496
1343	44.3	44.131	43.1812	43.3193
1344	42.347	43.2558	41.651	41.6456
1345	44.386	44.1877	43.6748	43.6395
1346	44.444	45.4686	43.9937	43.6415
1347	40.188	40.5569	39.3092	39.0048
1348	34.196	35.7839	33.8304	33.1513
1349	38.867	38.1272	38.2491	37.0163
1350	41.923	41.8181	41.4522	41.2486
1351	41.362	42.6061	40.7284	40.3095
1352	41.216	41.8244	40.6249	40.548
1353	41.437	41.8366	40.9767	40.6874
1354	40.078	41.3674	39.4834	38.9133
1355	42.473	41.0359	41.612	40.857
1356	39.017	40.438	38.9317	38.7035
1357	40.826	40.8401	40.0516	39.0698
1358	39.481	40.9455	38.3797	38.7756
1359	41.264	42.2941	40.7933	40.1833
1360	43.66	44.3292	42.3374	42.9981
1361	44.021	46.262	44.0157	43.2568
1362	46.132	45.5762	44.7866	45.6015
1363	41.421	44.3606	41.5045	41.0794
1364	45.464	45.4345	44.3997	44.8889
1365	45.23	47.456	45.5777	45.3689
1366	45.313	45.7897	44.4633	44.8857
1367	43.271	45.198	43.4203	43.3794
1368	44.52	46.1798	44.7805	45.0501
1369	45.121	46.2917	44.4195	44.5794
1370	43.8	45.3922	43.827	44.167
1371	43.142	43.9348	42.4143	42.7702
1372	42.994	42.8896	42.175	42.6947
1373	42.537	43.2384	41.6689	41.6989
1374	45.045	46.1891	45.1799	45.7437
1375	46.757	47.3934	45.9137	45.8468
1376	43.943	45.7969	44.2971	44.646
1377	41.837	43.3294	42.1604	42.157
1378	40.282	42.3715	40.8263	41.2574
1379	40.143	41.8738	40.6235	40.7169
1380	40.3	42.3841	40.2122	40.8109
1381	39.833	41.687	39.9057	40.6903
1382	37.901	39.0465	37.2506	37.6009
1383	35.988	37.395	36.3742	36.5669
1384	36.195	36.9277	35.9524	36.191
1385	35.41	36.6223	35.3972	35.3781
1386	36.586	37.6586	36.6621	36.4134
1387	37.268	38.0598	36.8592	36.5912
1388	34.404	35.5674	34.256	34.4741
1389	33.728	33.8473	33.3461	32.8772
1390	32.856	33.4474	32.2938	32.2578
1391	33.683	34.1065	33.0598	32.6734
1392	35.025	35.2152	34.9665	34.4404
1393	35.835	36.3473	35.7018	35.0073
1394	36.739	37.3156	36.619	36.3263
1395	36.367	36.0705	35.8437	34.5615
1396	31.915	32.9637	31.9238	31.3622
1397	32.119	31.9921	31.9798	30.46
1398	31.566	32.3013	31.3887	31.1303
1399	30.043	31.143	30.4264	29.2876
1400	29.209	29.2701	28.9486	28.8163
1401	25.336	26.5069	25.4541	24.4891
1402	25.958	26.8857	26.01	25.3072
1403	26.286	26.1238	26.0646	24.914
1404	23.702	23.8401	23.5969	23.1705
1405	21.136	20.8988	21.2178	19.8012
1406	18.887	19.2021	18.7922	18.5951
1407	17.215	16.7382	17.2072	15.8465
1408	15.9	16.8971	16.3207	15.7786
1409	18.144	17.3242	17.8907	16.543
1410	18.647	18.59	18.2581	18.138
1411	17.813	17.6972	17.6328	16.4979
1412	17.742	18.4857	17.9971	17.2984
1413	18.168	17.6108	18.3621	16.6848
1414	14.325	14.7345	14.1715	14.2598
1415	10.781	10.4926	10.7309	9.49993
1416	9.298	9.49798	9.31521	9.06418
1417	8.72	8.40864	8.7759	7.75097
1418	7.02	7.65922	6.85757	6.82909
1419	6.321	5.77347	6.57689	5.43532
1420	5.723	5.96929	5.37707	5.08311
1421	6.144	5.44942	6.11776	5.28294
1422	4.342	5.19471	4.30052	4.11617
1423	4.452	3.98505	4.23413	3.01323
1424	3.6	3.09486	3.41205	2.81299
1425	2.002	1.57038	1.75779	1.04102
1426	1.005	0.869933	0.454804	0.0654822
1427	0.907	0.325245	0.38522	0
1428	0.544	0	0.0567318	0
1429	0.268	0	0	0
1430	0.421	0.285844	0	0
1431	0.113	0	0	0
1432	0.056	0	0	0
1433	0	0	0	0
1434	0	0	0	0.379873
1435	0	0	0	0
1436	0	0	0	0
1437	0.169	0	0	0
1438	0.521	0.178362	0	0.542766
1439	0.94	0.522733	0.988541	0.374664
1440	1.954	1.75121	0.83861	0.596794
1441	1.086	1.56139	0.895649	1.13643
1442	2.139	2.51315	0.958199	2.25436
1443	4.814	5.645	3.86624	4.31875
1444	11.648	11.8795	10.6558	9.7871
1445	15.53	15.4224	14.2098	14.6853
1446	14.133	13.6824	13.3993	13.1582
1447	12.622	13.4901	12.4583	12.8217
1448	21.861	24.6618	21.8818	22.614
1449	37.58	35.3098	36.1147	34.7566
1450	33.834	34.8528	32.9213	33.7444
1451	37.532	36.3685	36.0179	36.5801
1452	38.929	40.2608	37.5871	38.8801
1453	41.432	40.3345	39.9954	40.1278
1454	35.105	36.7177	34.6103	34.5687
1455	36.081	36.0844	35.6644	34.8057
1456	35.967	36.3588	35.3268	35.2635
1457	38.851	39.0978	39.326	38.3004
1458	39.338	40.1693	38.5585	39.3584
1459	40.153	41.9939	41.2895	40.061
1460	42.65	42.8585	41.4584	42.0762
1461	40.999	41.9018	41.5419	41.4403
1462	41.31	41.3322	40.0554	41.5367
1463	40.306	41.3875	40.0909	39.7457
1464	40.892	41.337	39.841	40.2988
1465	42.756	43.2651	41.8907	42.2074
1466	43.74	43.8395	43.1504	43.5615
1467	40.483	42.0721	39.8088	39.7647
1468	40.325	41.4058	39.9066	40.9268
1469	39.461	40.0853	37.819	37.94
1470	37.225	38.9547	37.4805	37.623
1471	38.308	38.3525	36.8069	36.8896
1472	37.131	38.6053	36.5467	37.2676
1473	39.152	39.889	38.4079	38.4486
1474	38.934	39.9751	38.4127	38.2852
1475	37.195	38.4263	35.8948	36.465
1476	36.872	38.4823	36.3299	36.5573
1477	35.89	37.4208	34.988	35.4861
1478	34.678	34.9274	33.8531	33.7707
1479	32.502	34.3522	32.4732	32.6602
1480	35.305	35.892	34.7181	34.7442
1481	37.734	38.8977	37.6407	37.503
1482	37.667	38.9819	37.3323	37.0861
1483	37.56	38.6438	37.7278	37.4911
1484	37.316	39.0059	36.9631	36.7237
1485	39.956	39.9991	39.2924	38.5148
1486	36.343	36.7691	35.6332	35.1436
1487	30.381	32.1162	30.7239	29.943
1488	29.679	31.9432	29.538	29.5148
1489	37.966	37.4373	37.1103	36.024
1490	38.322	38.3775	37.4854	37.5044
1491	35.27	37.1989	35.5117	34.7259
1492	36.034	35.4919	35.5743	35.7351
1493	28.318	30.6723	28.7669	27.8128
1494	27.87	28.2706	27.033	27.0195
1495	29.289	30.2441	29.884	28.7738
1496	31.379	30.7269	31.0474	31.1296
1497	26.555	28.7161	27.3244	26.4852
1498	25.664	25.6077	25.4184	25.6171
1499	18.95	20.2179	19.1527	18.5092
1500	17.721	17.4963	17.2567	16.8396
1501	13.615	14.0669	13.4111	12.7895
1502	11.752	11.3219	11.7109	11.7533
1503	9.932	10.3892	9.90462	9.16158
1504	11.11	11.601	11.3514	11.8537
1505	11.015	11.5068	11.2685	10.6404
1506	12.288	13.8187	12.786	13.1353
1507	15.658	15.7259	15.4981	15.4077
1508	15.69	17.1588	15.8676	16.626
1509	16.384	16.7564	15.7488	15.5679
1510	15.228	15.6637	15.2713	15.4081
1511	14.028	14.9817	14.6404	14.4407
1512	14.32	15.4676	14.5485	14.4293
1513	13.223	13.7253	13.8868	13.2057
1514	8.87	9.94982	9.36132	9.1555
1515	8.253	7.58996	8.07006	7.61471
1516	5.639	6.03478	5.67994	5.35546
1517	2.97	3.57019	3.45162	3.18979
1518	1.428	1.39883	0.975372	0.412283
1519	0.406	0.913681	1.17479	0.674492
1520	0	0.793522	0.133119	0
1521	0	0.21397	0.206241	0
1522	0.309	0	0	0
1523	0.648	0.188089	0.7805	0
1524	1.706	0.642152	1.11188	0.145693
1525	0.641	0	0.0510091	0
1526	0	0	0	0
1527	0	0	0	0
1528	0	0	0	0
1529	0	0	0	0
1530	0	0	0	0
1531	0	0	0	0
1532	0	0	0	0
1533	0.295	0	0	0
1534	3.432	2.34972	2.45041	1.6036
1535	4.222	3.36022	3.61847	2.19979
1536	4.989	4.37227	3.83882	2.58434
1537	5.118	4.84959	4.7356	3.87318
1538	7.231	7.18636	7.13887	5.91376
1539	9.734	9.06184	8.66194	7.86928
1540	11.075	10.749	10.2452	9.02461
1541	9.848	9.71982	8.84794	8.73885
1542	9.326	9.77663	8.60955	8.351
1543	13.39	12.9791	13.3274	12.7712
1544	18.085	17.6575	17.3857	17.3501
1545	18.431	19.3058	18.4847	17.8784
1546	20.061	19.5417	18.726	18.9753
1547	21.109	21.8351	20.8597	20.9386
1548	27.884	27.7329	26.461	26.7138
1549	33.144	33.4515	32.5527	32.8417
1550	35.333	35.0522	34.2205	34.883
1551	35.393	36.5694	35.347	35.4468
1552	37.815	38.8631	37.3622	37.5238
1553	40.929	41.8353	41.5195	41.0227
1554	42.316	42.3984	41.6167	42.4
1555	42.713	44.3668	43.4361	43.1937
1556	46.964	46.3239	45.8901	46.5147
1557	43.977	45.724	44.533	44.0518
1558	43.456	43.1923	42.6584	43.29
1559	40.267	41.7815	40.8756	40.4248
1560	42.806	42.119	42.1441	42.8924
1561	40.92	42.4868	41.1225	41.719
1562	43.169	43.5574	43.0851	43.4729
1563	41.548	42.4669	41.5224	41.4724
1564	39.259	42.1585	39.1522	39.7463
1565	41.226	41.2325	40.4846	40.9691
1566	38.48	39.1829	37.5103	38.694
1567	37.777	39.2605	37.3471	37.9753
1568	43.516	44.6953	42.7351	43.647
1569	45.742	47.4553	44.3918	45.2087
1570	45.438	46.6949	45.1619	45.0726
1571	45.757	46.8059	45.2515	45.1338
1572	47.09	48.0906	46.428	46.631
1573	46.304	47.7767	45.7291	45.6284
1574	44.552	44.5676	43.6055	43.3768
1575	41.845	43.6202	41.8237	41.7117
1576	45.209	45.8575	43.9349	43.9873
1577	47.268	48.0814	46.9219	46.8891
1578	47.679	48.2082	46.5801	46.7642
1579	47.046	47.9666	46.3793	46.1886
1580	47.003	47.6856	45.9472	46.1436
1581	47.103	47.7474	46.282	46.6461
1582	46.569	46.9194	46.2398	46.0569
1583	45.385	47.0998	45.2738	45.2021
1584	45.889	46.6132	45.9451	45.9537
1585	44.22	45.2405	43.7558	43.4565
1586	42.794	43.7322	42.6373	42.3132
1587	43.874	45.2427	44.9405	44.097
1588	46.873	47.2546	45.4779	46.4718
1589	47.556	48.5043	46.6293	46.9693
1590	47.555	48.9709	47.0635	47.4436
1591	47.146	48.8497	47.1935	47.0203
1592	45.344	45.765	44.9515	45.4677
1593	39.036	41.8808	39.8126	40.1812
1594	43.254	43.6517	42.1	42.8514
1595	44.318	46.5265	44.3575	44.6181
1596	42.601	40.945	41.9033	42.2396
1597	30.937	34.3233	32.0854	31.1653
1598	37.842	37.3578	37.4704	37.4727
1599	39.112	40.3916	38.9327	38.2446
1600	40.81	41.734	40.7941	40.9923
1601	42.26	41.6827	40.9012	40.6878
1602	39.862	41.5736	40.2285	39.9878
1603	39.991	39.3276	39.0413	38.525
1604	33.221	34.097	33.0341	32.9229
1605	28.558	29.434	28.2737	27.3048
1606	30.955	28.9978	30.1141	29.8136
1607	24.159	26.6954	25.3103	23.8116
1608	26.198	26.4731	26.4907	26.1738
1609	28.036	28.39	27.6928	26.0395
1610	28.112	28.333	28.1797	27.7182
1611	28.419	27.5351	27.1419	27.0592
1612	28.132	30.9325	29.3519	28.5529
1613	34.682	32.5262	32.657	32.6585
1614	26.294	30.7892	27.354	26.6317
1615	30.106	26.358	26.975	28.1403
1616	12.712	14.8047	14.3276	13.0533
1617	8.938	9.10179	9.43298	8.28322
1618	7.281	7.41371	7.03278	6.65494
1619	5.274	6.5782	5.43306	4.03915
1620	4.63	6.75829	4.81455	4.02084
1621	4.845	6.22458	3.98406	2.74197
1622	4.382	5.10631	3.57939	3.22252
1623	3.32	4.07377	3.86715	1.8516
1624	3.472	2.7184	2.23691	1.20488
1625	2.459	2.45314	1.74403	1.57907
1626	1.631	1.70774	0.928647	0
1627	0.452	0.561797	0	0
1628	1.687	1.34423	0	0
1629	3.671	2.52523	1.02492	1.01095
1630	3.691	3.58964	2.77852	2.47903
1631	7.811	6.25121	5.30926	4.66268
1632	12.106	12.003	11.4763	11.1449
1633	18.468	17.7827	16.2898	16.5225
1634	23.03	24.3555	23.2754	22.8465
1635	25.571	24.6231	22.8485	22.386
1636	20.199	22.2079	19.8635	19.0794
1637	19.733	19.4576	19.005	18.6758
1638	21.193	22.4919	19.9247	20.5751
1639	32.627	31.8676	33.3964	31.8262
1640	42.198	40.4681	40.2765	40.7554
1641	40.594	42.0065	39.9943	39.9232
1642	42.752	43.7477	42.033	42.1858
1643	45.735	44.8183	45.5005	44.6433
1644	44.226	43.8304	43.1601	43.4697
1645	43.927	43.7089	44.3363	43.307
1646	44.248	43.2018	43.3395	43.4899
1647	41.131	42.7416	41.7058	40.5932
1648	41.299	42.2061	41.1567	41.1118
1649	42.026	42.2814	42.324	41.3701
1650	43.618	42.8911	42.2243	43.2081
1651	41.5	42.0592	41.2714	40.7969
1652	42.497	42.4134	41.4169	42.4831
1653	44.772	44.4923	44.2146	43.5925
1654	44.476	43.9548	43.6266	43.7114
1655	42.79	43.7932	41.8467	42.4043
1656	44.391	44.8921	44.0679	44.3174
1657	43.476	44.6837	42.9609	43.5757
1658	43.689	45.1393	43.6251	44.1064
1659	40.984	42.6391	40.6053	41.5025
1660	38.017	39.0305	37.5165	38.3147
1661	39.612	40.6394	39.8763	40.3086
1662	44.24	44.0861	42.9461	44.2212
1663	42.002	43.9551	40.9622	41.6377
1664	43.51	43.6572	42.237	42.8756
1665	43.97	44.7605	42.9953	44.0318
1666	46.474	47.4192	45.7863	45.3386
1667	46.601	48.0321	46.0247	46.8147
1668	45.965	47.1281	45.8075	45.6398
1669	45.11	46.7158	43.9134	44.6134
1670	44.024	45.5012	43.6211	43.5014
1671	41.966	43.908	41.9751	41.9001
1672	41.386	42.0159	40.7138	40.8308
1673	41.767	43.0817	42.065	41.5738
1674	43.894	44.8133	43.1996	43.2498
1675	46.216	46.8158	44.9627	45.1666
1676	47.228	47.6554	46.2479	45.6661
1677	47.052	48.5671	47.1977	46.2284
1678	44.513	46.3709	44.4825	44.2315
1679	43.543	44.5433	42.8793	41.9678
1680	41.198	41.6457	40.8567	40.1466
1681	40.506	42.3759	41.3261	40.0962
1682	44.254	43.9435	43.9799	44.0659
1683	37.427	39.4876	38.0459	37.0743
1684	35.371	36.4539	34.738	34.7749
1685	41.431	40.7401	41.5953	39.4545
1686	44.012	44.5961	43.8954	44.0267
1687	39.485	41.4414	39.9019	38.8243
1688	34.26	35.2036	34.6012	34.8426
1689	24.847	26.8928	25.2215	24.4295
1690	18.222	18.9024	18.1963	17.9314
1691	10.566	12.3444	10.6462	10.4602
1692	7.185	8.70752	7.22752	7.00472
1693	4.257	8.40635	5.88053	4.3328
1694	7.515	10.7754	7.03904	7.39309
1695	5.799	9.86551	7.17515	5.98645
1696	7.953	9.21642	7.77727	7.74616
1697	9.456	10.7896	10.332	9.06636
1698	11.576	11.4508	10.909	10.6233
1699	9.747	10.9572	9.67033	9.78552
1700	11.151	11.0683	11.4634	10.1306
1701	11.245	12.0523	11.7203	11.2303
1702	9.594	9.37943	9.6247	8.62465
1703	10.912	9.95545	10.8109	9.92362
1704	12.963	12.7396	13.0503	13.0176
1705	12.563	12.4183	12.1127	11.5525
1706	10.405	11.1888	10.3585	10.4715
1707	14.459	13.4762	14.5698	14.2281
1708	16.907	15.6693	15.4276	15.3489
1709	14.959	16.1054	15.1829	14.6131
1710	17.506	16.5583	17.063	15.996
1711	13.305	14.3523	13.1816	11.7283
1712	13.239	13.124	13.3781	12.0748
1713	11.443	11.5878	12.0968	10.7765
1714	11.279	10.4694	11.3992	10.6179
1715	11.702	11.659	12.3033	10.7956
1716	14.952	14.7008	14.9856	14.2912
1717	14.235	14.1055	13.9997	12.9573
1718	11.772	11.1988	11.4927	10.5686
1719	7.743	7.15827	7.62325	7.135
1720	5.262	5.21633	5.72121	4.17253
1721	3.54	3.3287	3.47054	2.3143
1722	2.088	2.15594	2.53474	0.531392
1723	2.093	2.07829	1.8326	0.644778
1724	1.802	2.25653	1.74232	0.287138
1725	1.434	1.33541	1.43802	0.131771
1726	2.105	1.34757	1.54989	0.341581
1727	1.698	1.4923	1.55936	0.583216
1728	3.181	3.0316	3.12631	1.83159
1729	3.078	3.44142	3.67899	2.4975
1730	3.941	3.97388	3.57868	2.81863
1731	4.722	5.20926	5.00588	4.22469
1732	4.592	5.29677	4.82897	3.88288
1733	3.404	3.78618	3.02381	2.86782
1734	3.413	5.02675	4.14227	4.01842
1735	6.51	6.09415	6.02909	5.9072
1736	5.413	5.9274	4.88817	5.01062
1737	7.291	5.7921	6.28403	6.07011
1738	6.826	7.26291	6.0702	6.10807
1739	9.692	9.27611	9.82244	8.6746
1740	10.833	11.2362	11.2192	10.3386
1741	9.819	11.5848	10.5964	9.70901
1742	13.017	13.6236	13.3598	12.8609
1743	15.153	17.0776	16.1105	15.3381
1744	20.098	22.2944	21.0388	20.7322
1745	22.139	22.8092	22.4244	21.7504
1746	15.622	18.0673	16.1227	16.029
1747	16.975	16.5315	17.3137	16.9995
1748	16.976	17.3684	16.5709	16.939
1749	15.934	16.5438	16.1599	15.4658
1750	17.059	17.5531	16.92	16.54
1751	16.766	17.5985	16.6426	16.2523
1752	17.202	18.0466	16.5688	16.805
1753	20.679	20.1162	20.466	19.8351
1754	23.128	23.543	22.8521	23.3129
1755	22.241	22.8972	21.895	21.4588
1756	21.3	23.2753	21.4269	21.3503
1757	30.094	28.7006	29.7717	29.1992
1758	34.643	35.6677	33.8419	34.3769
1759	36.044	36.1133	35.0764	35.2055
1760	31.302	31.9839	29.7255	30.3011
1761	33.721	33.8695	33.1033	33.0026
1762	40.979	40.3396	39.548	40.1608
1763	41.544	42.9451	41.2852	40.9661
1764	42.806	43.6862	42.1457	43.1108
1765	46.366	46.6557	45.6047	45.0206
1766	45.768	46.5115	44.7806	45.2487
1767	45.358	45.5367	45.1028	44.3238
1768	46.114	45.8381	44.6952	45.1724
1769	44.235	46.3346	44.6946	44.4243
1770	45.927	45.7432	44.6546	45.0638
1771	43.687	45.1035	43.1352	43.3936
1772	44.367	44.3308	43.3911	43.7776
1773	41.214	42.387	39.9951	39.5287
1774	37.34	37.71	36.6106	36.4185
1775	35.787	36.547	34.8565	34.444
1776	38.745	38.2114	38.5009	38.3693
1777	38.293	38.9037	37.0961	36.4883
1778	36.397	38.2323	36.9486	36.6089
1779	37.479	37.0007	36.099	35.2381
1780	34.319	35.0331	33.807	33.1681
1781	33.491	33.5104	32.4995	32.0225
1782	31.277	32.3841	31.0854	31.023
1783	28.228	28.7121	27.1911	26.8271
1784	19.927	20.1374	19.8734	19.5454
1785	12.877	13.5857	12.3577	11.9861
1786	10.414	12.064	10.5587	10.5645
1787	11.672	11.0279	11.3156	10.5383
1788	7.467	9.243	6.81537	6.85365
1789	9.497	9.85584	9.99017	8.87046
1790	10.919	10.1308	9.74343	9.63953
1791	8.122	9.17667	8.68002	7.3325
1792	11.75	11.6441	11.548	10.958
1793	11.382	11.7725	11.1715	9.81832
1794	10.238	10.2565	9.56385	8.56686
1795	11.995	10.3185	11.1383	10.0254
1796	8.325	8.96469	8.44763	7.79827
1797	10.299	9.26926	10.4035	8.86335
1798	11.796	12.1296	11.5194	11.2973
1799	12.503	12.6456	11.9494	11.1938
